# Supplementary material for: Advanced LC–MS-based methods to study the co-occurrence and metabolization of multiple mycotoxins in cereals and cereal-based food
Source: PubMed Central journal article supplement (PMC5775372; doi:10.1007/s00216-017-0750-7), 2017-12-22
Supplement: 216_2017_750_MOESM1_ESM.pdf [file 216_2017_750_MOESM1_ESM.pdf]

## **Analytical and Bioanalytical Chemistry**

### **Electronic Supplementary Material**

#### **Advanced LC–MS-based methods to study the co-occurrence and metabolization of multiple mycotoxins in cereals and cereal-based food**

Alexandra Malachová, Milena Stránská, Marta Václavíková, Christopher T. Elliott, Connor Black, Julie Meneely, Jana Hajšlová, Chibundu N. Ezekiel, Rainer Schuhmacher, Rudolf Krska
